# Supplementary material
Source: publisher site journal article supplement (https://www.dovepress.com/article/569956)

Supplementary Table 1: List of fluorescently labelled antibodies used for mouse cell or human PBMCs surface staining in flow cytometry analysis.

| <b>Antibody</b>                     | <b>Clone</b> | <b>Supplier</b>          |
|-------------------------------------|--------------|--------------------------|
| Anti-mouse CD45 Percp               | 30-F11       | BioLegend                |
| LIVE/DEAD® Fixable Violet BV421     |              | Thermo Fisher Scientific |
| Anti-mouse CD11b BV650              | M1/70        | BioLegend                |
| Anti-mouse F4-80 PE-Cy7             | BM8          | BioLegend                |
| Anti-mouse IA-IE Alexa 700          | M5/114.15.2  | BioLegend                |
| Anti-mouse Ly6C APC-Cy7             | HK1.4        | BioLegend                |
| Anti-mouse Ly6G BV711               | 1A8          | BioLegend                |
| Anti-mouse SiglecF BV605            | E50-2440     | BD Biosciences           |
| Anti-human CD14 BV650               | M5E2         | BioLegend                |
| Anti-human CD11b BV510              | ICRF44       | BioLegend                |
| Anti-human CD45 Alexa Fluor® 700    | 2D1          | BioLegend                |
| Anti-human CD16 APC/Cy7             | 3G8          | BioLegend                |
| Zombie B550rm Fixable Viability Kit |              | BioLegend                |
| Anti-mouse CD11b APC                | M1/70        | BioLegend                |
| Anti-mouse CD11c FITC               | N418         | BioLegend                |
| Anti-mouse CD45 AF700               | 30-F11       | BioLegend                |
| Anti-mouse CD16/32                  | 93           | BioLegend                |
| Anti-mouse F4-80 BV510              | BM8          | BioLegend                |

Supplementary Table 2: List of fluorescently labelled antibodies used for mouse cell or human PBMCs intracellular staining in flow cytometry analysis.

| <b>Antibody</b>                                                 | <b>Clone</b> | <b>Supplier</b>          |
|-----------------------------------------------------------------|--------------|--------------------------|
| Anti-mouse INOS PE                                              | CXNFT        | Thermo Fisher Scientific |
| Anti-mouse CD206 APC                                            | C068C2       | BioLegend                |
| Anti-human CD68 BV785                                           | Y1/82A       | BioLegend                |
| Ferritin Heavy Chain                                            | 39G3         | Thermo Fisher Scientific |
| Coralite® plus 488-conjugated LC3B-specific polyclonal antibody |              | Proteintech              |

Supplementary Table 3: The effect sizes and confidence intervals of the core indicators in the figures.

| Indicator              | Comparison Groups              | Cohen's d | 95% CI for Cohen's d | Effect Size Interpretation |
|------------------------|--------------------------------|-----------|----------------------|----------------------------|
| Classical Monocytes    | Healthy Control vs. Asthmatics | -0.72     | (-1.48, 0.04)        | Medium to Large            |
| Nonclassical Monocytes | Healthy Control vs. Asthmatics | 0.81      | (0.04, 1.58)         | Large                      |
| Percentage of RPM      | PBS vs. HDM                    | 1.29      | (0.33, 2.25)         | Large to Very Large        |
| Percentage of Pre-RPM  | PBS vs. HDM                    | 0.93      | (0.01, 1.84)         | Large                      |
| Percentage of AM       | PBS vs. HDM                    | 2.30      | (0.75, 3.85)         | Very Large                 |
| Percentage of IM       | PBS vs. HDM                    | 0.12      | (-1.05, 1.28)        | Negligible                 |
| Pre-RPM iNOS           | PBS vs. HDM                    | -1.54     | (-2.66, -0.41)       | Very Large                 |
| Pre-RPM CD206          | PBS vs. HDM                    | -0.18     | (-1.17, 0.80)        | Negligible                 |
| RPM iNOS               | PBS vs. HDM                    | -2.24     | (-3.51, -0.97)       | Very Large                 |
| RPM CD206              | PBS vs. HDM                    | 0.15      | (-0.83, 1.13)        | Negligible                 |
| AM iNOS                | PBS vs. HDM                    | -1.37     | (-2.69, -0.06)       | Large                      |
| AM CD206               | PBS vs. HDM                    | 0.23      | (-0.94, 1.40)        | Small                      |
| IM iNOS                | PBS vs. HDM                    | -1.64     | (-3.01, -0.26)       | Very Large                 |
| IM CD206               | PBS vs. HDM                    | -0.70     | (-1.90, 0.51)        | Medium                     |
| Pre-RPM LC3B           | PBS vs. HDM                    | -1.31     | (-2.40, -0.22)       | Large                      |
| RPM LC3B               | PBS vs. HDM                    | -1.55     | (-2.68, -0.42)       | Very Large                 |
| AM LC3B                | PBS vs. HDM                    | -1.30     | (-2.61, 0.01)        | Large                      |
| IM LC3B                | PBS vs. HDM                    | -1.23     | (-2.51, 0.06)        | Large                      |
| Pre-RPM FTH1           | PBS vs. HDM                    | 1.21      | (0.14, 2.29)         | Large                      |
| RPM FTH1               | PBS vs. HDM                    | 1.11      | (0.05, 2.17)         | Large                      |
| AM FTH1                | PBS vs. HDM                    | 1.49      | (0.15, 2.83)         | Very Large                 |
| IM FTH1                | PBS vs. HDM                    | 1.12      | (-0.15, 2.39)        | Large                      |

Supplementary Figure 1 Gating strategies of monocyte-macrophages and its subpopulations. (A) in human peripheral blood mononuclear cells, (B) mouse peripheral blood, (C) mouse spleen, (D) mouse lung

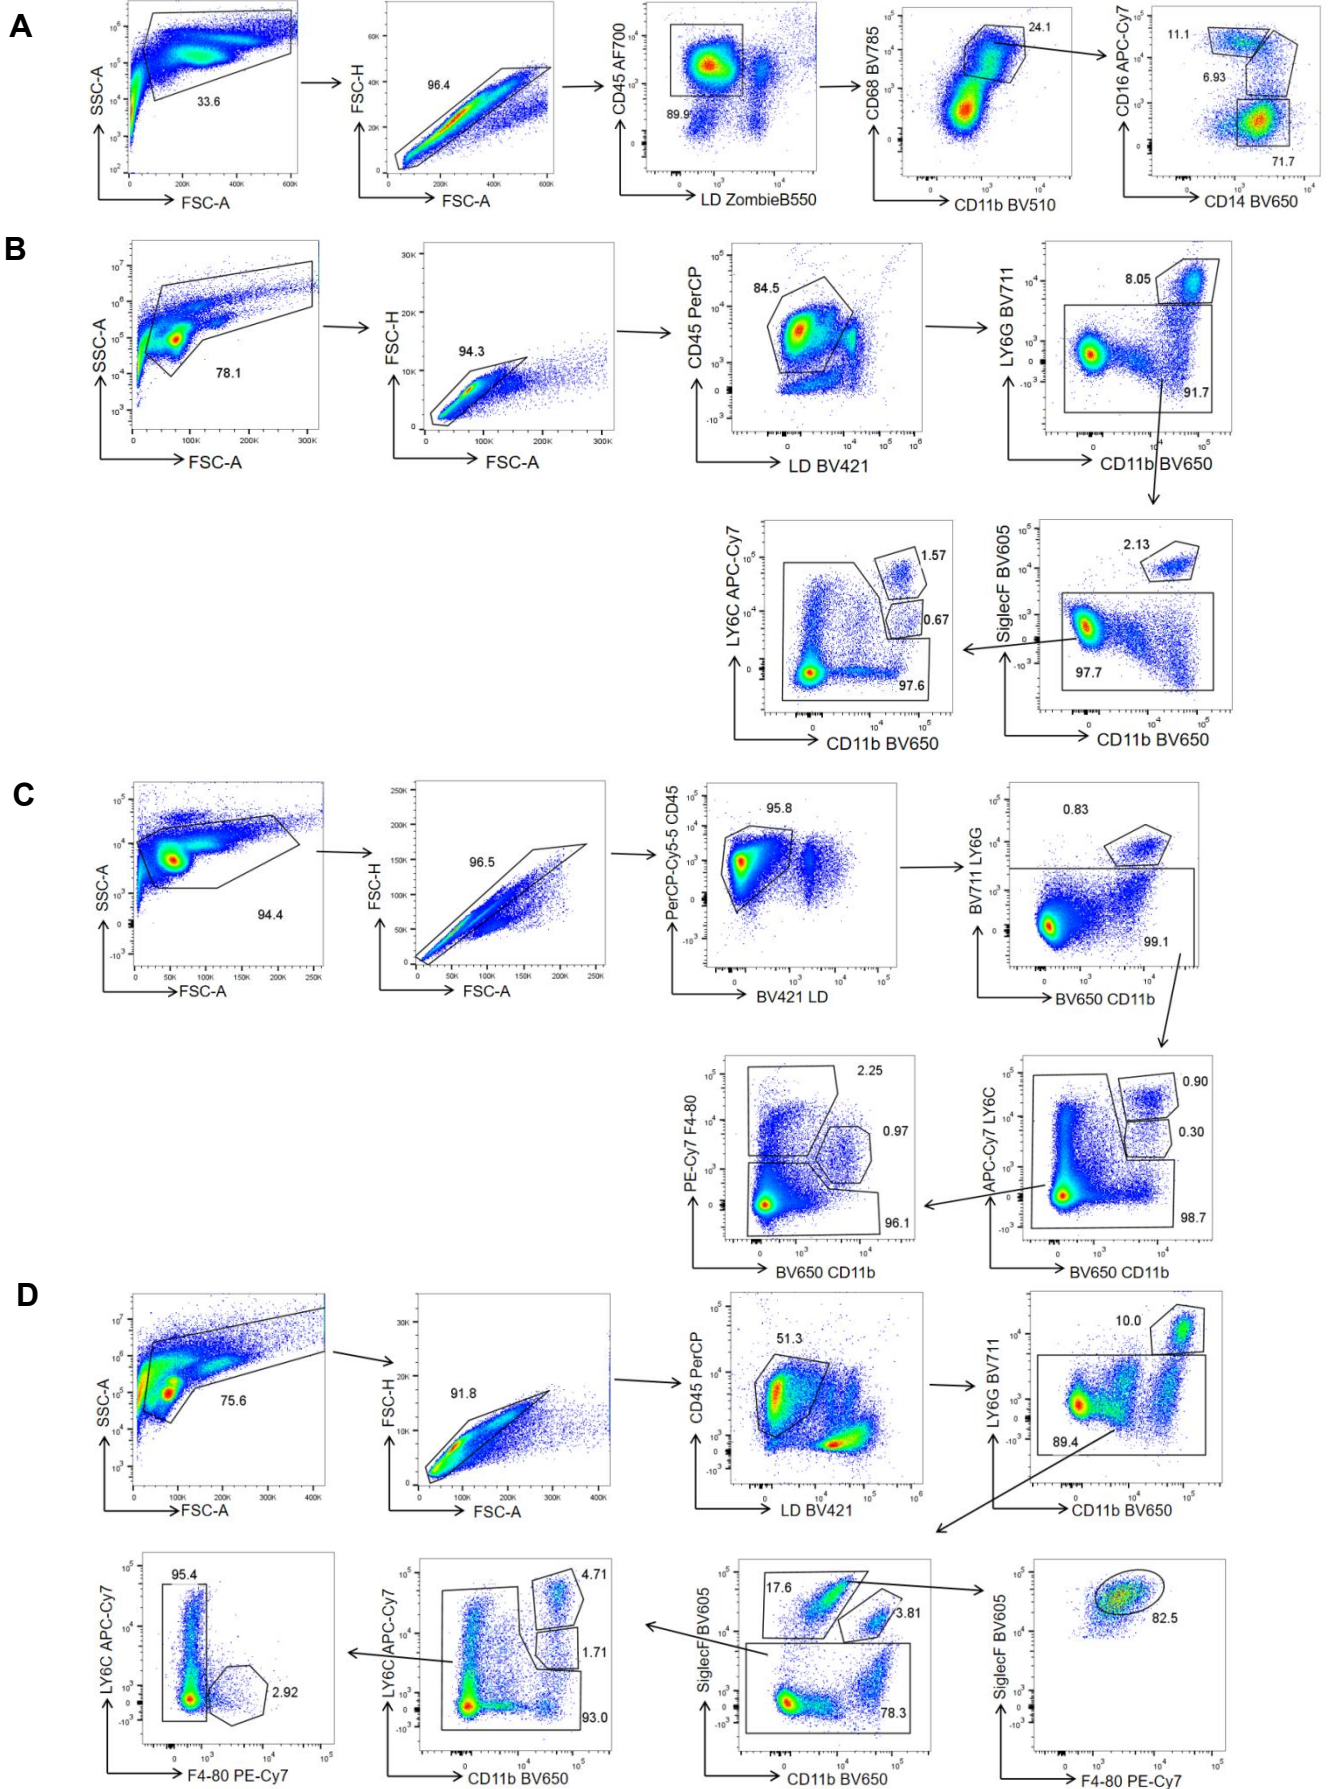

Supplementary Figure 2 (A) Percentage of alveolar macrophages isolated by adhesion from BALF. (B) mRNA expression of NCOA4 and LC3B in lung tissues by RT-qPCR (n=10 per group) . \*P<0.05

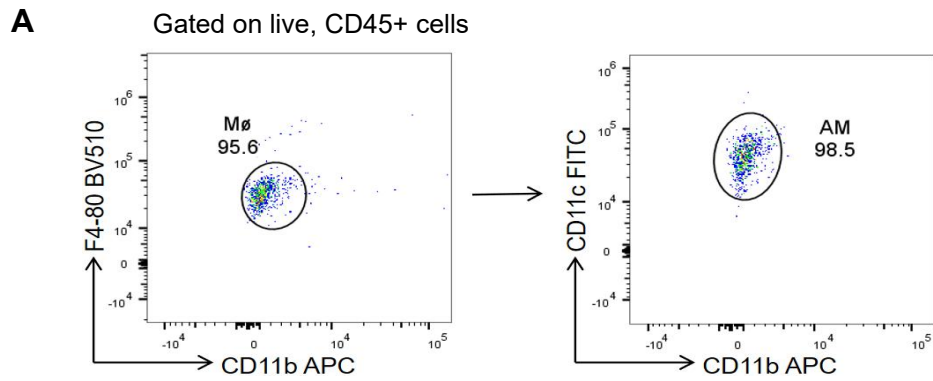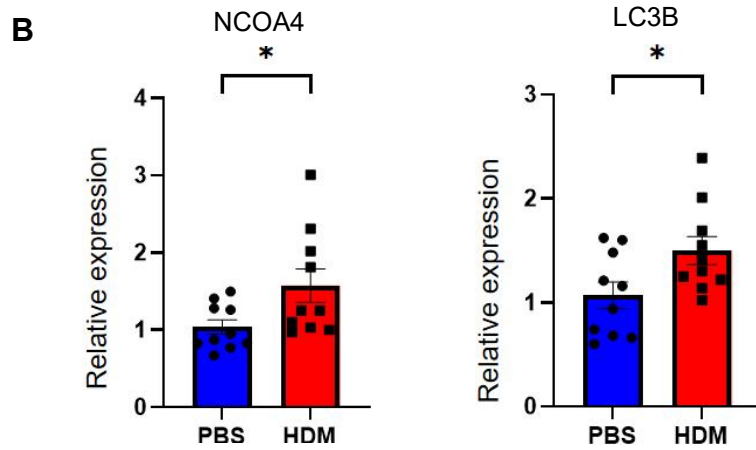

Supplement: Supplementary file 1 [file 569956%20Revised%20Supplementary%20Material.pdf]
